# Supplementary material for: Anti-Inflammatory Effects of Idebenone Attenuate LPS-Induced Systemic Inflammatory Diseases by Suppressing NF-κB Activation
Source: MDPI journal article supplement (doi:10.3390/antiox13020151), 2024-01-25
Supplement: s1 [file s1]

Supplementary Materials for

# Anti-Inflammatory Effects of Idebenone Attenuate LPS-Induced Systemic Inflammatory Diseases by Suppressing NF- $\kappa$ B Activation

Yumin Choi <sup>1,2,†</sup>, Young-Lai Cho <sup>1,†</sup>, Sujeong Park <sup>1,2</sup>, Minkyung Park <sup>1,2</sup>, Keun-Seok Hong <sup>1</sup>, Young Jun Park <sup>1,2</sup>,  
In-Ah Lee <sup>3</sup>, Su Wol Chung <sup>4</sup>, Heedoo Lee <sup>5</sup> and Seon-Jin Lee <sup>1,2,\*</sup>

<sup>1</sup> Environmental Disease Research Center, Korea Research Institute of Bioscience and Biotechnology (KRIBB), Daejeon 34141, Republic of Korea; u\_min98@naver.com (Y.C.); ylcho@kribb.re.kr (Y.-L.C.); sjpark01@kribb.re.kr (S.P.); mingk@kribb.re.kr (M.P.); hongso6@naver.com (K.-S.H.); pyj71@kribb.re.kr (Y.J.P.)

<sup>2</sup> Department of Functional Genomics, University of Science and Technology (UST), Daejeon 34113, Republic of Korea

<sup>3</sup> Department of Chemistry, Kunsan National University, Gunsan 54150, Republic of Korea; leeinah@kunsan.ac.kr

<sup>4</sup> Department of Biological Sciences, College of Natural Sciences, University of Ulsan, Ulsan 44610, Republic of Korea; swchung@ulsan.ac.kr

<sup>5</sup> Department of Biology and Chemistry, Changwon National University, Changwon 51140, Republic of Korea; leehd@changwon.ac.kr

\* Correspondence: sjlee@kribb.re.kr; Tel.: +82-42-879-8293

† These authors contributed equally to this work.

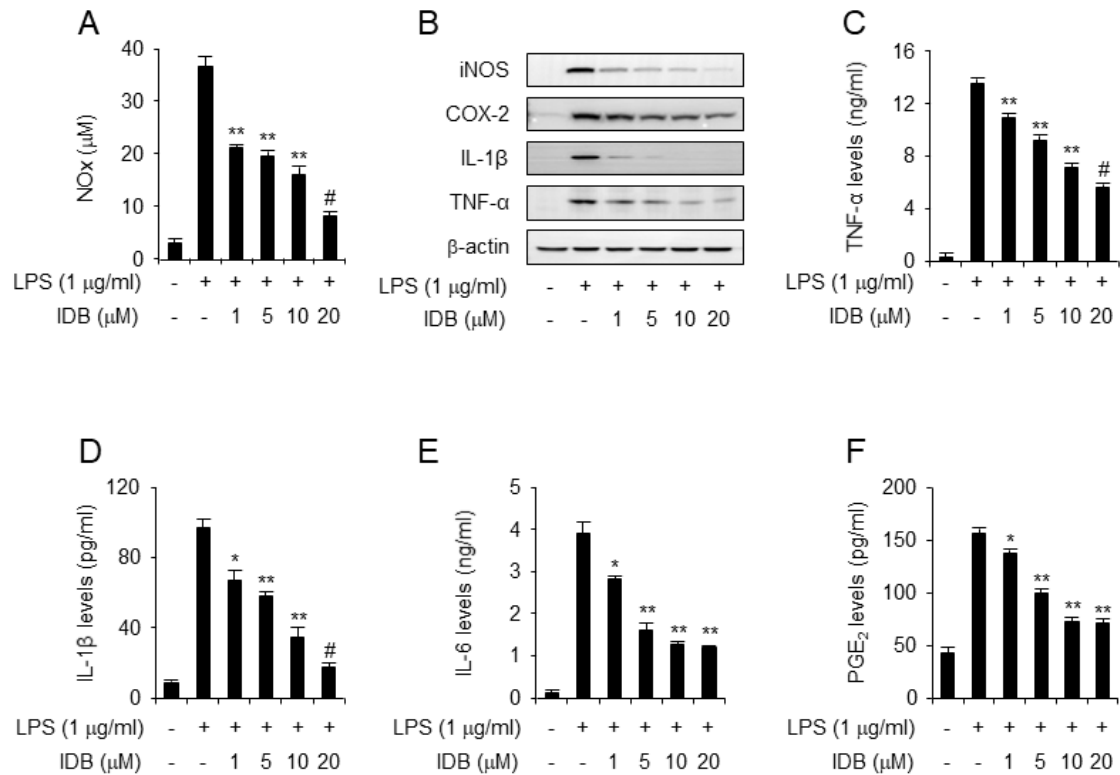

**Supplementary Figure S1.** Idebenone inhibits LPS-stimulated expression of proinflammatory mediators in J774A.1 cells. Idebenone inhibits LPS-induced production of NO metabolites, TNF- $\alpha$ , IL-1 $\beta$ , IL-6, and PGE<sub>2</sub> in J774A.1 cells. (A) NO metabolite secretion was assessed using Griess reagent. (B) Western blotting analysis was used to examine protein expression of inflammatory enzymes (iNOS, COX-2) and pro-inflammatory cytokines (IL-1 $\beta$ , TNF- $\alpha$ ) in LPS-induced J774A.1 cells in the presence or absence of various doses of idebenone (1, 5, 10, 20  $\mu$ M), with  $\beta$ -actin as the loading control. Cells were pretreated with idebenone (1, 5, 10, 20  $\mu$ M) for 2 h before LPS treatment (1  $\mu$ g/mL). Cells were harvested after 18 h. The secretion of (C) TNF- $\alpha$ , (D) IL-1 $\beta$ , (E) IL-6, and (F) PGE<sub>2</sub> by LPS-stimulated J774A.1 cells treated with or without idebenone was assessed using ELISA. Graphs indicate the mean of three independent experiments. Statistical analysis was performed using paired two-tailed Student's *t*-test. \**p* < 0.05, \*\**p* < 0.01, and #*p* < 0.001.
